# Supplementary material
Source: PubMed Central journal article supplement (PMC7370851)
Supplement: NIHMS1576600-supplement-1.pdf [file NIHMS1576600-supplement-1.pdf]

Supplementary Table 1 - Reagents list

| Antibodies                           |             |                   |            |               |                                           |
|--------------------------------------|-------------|-------------------|------------|---------------|-------------------------------------------|
| Protein                              | Application | Supplier          | Catalog #  | Concentration | Additional notes                          |
| Cleaved PARP                         | WB          | Cell Signaling    | 9544       | 1:1000        |                                           |
| p-AMPK (Thr172)                      | WB          | Cell Signaling    | 2535       | 1:1000        |                                           |
| AMPK $\alpha$                        | WB          | Cell Signaling    | 5831       | 1:1000        |                                           |
| GAPDH                                | WB          | Sigma             | G8795      | 1:5000        |                                           |
| p-Her2 (Tyr1221/1222)                | WB          | Cell Signaling    | 2243       | 1:1000        |                                           |
| Her2                                 | WB          | Cell Signaling    | 4290       | 1:1000        |                                           |
| p-ERK1/2 (Thr202/Tyr204)             | WB          | Cell Signaling    | 9106       | 1:2000        |                                           |
| ERK1/2                               | WB          | Cell Signaling    | 9102       | 1:1000        |                                           |
| p-Akt (Ser473)                       | WB          | Cell Signaling    | 4060       | 1:1000        |                                           |
| Akt                                  | WB          | Cell Signaling    | 9272       | 1:1000        |                                           |
| p-PRAS40 (Ser246)                    | WB          | Cell Signaling    | 13175      | 1:1000        |                                           |
| p-GSK-3 $\beta$ (Ser9)               | WB          | Cell Signaling    | 5558       | 1:1000        |                                           |
| p-S6-RP (Ser240/244)                 | WB          | Cell Signaling    | 5364       | 1:2000        |                                           |
| $\alpha$ -Tubulin                    | WB          | Santa Cruz        | 8035       | 1:2000        | Used for all except Figs. S1C, 4B, 5B, 6G |
| $\alpha$ -Tubulin                    | WB          | Cell Signaling    | 3873       | 1:5000        | Used for Figs. S1C, 4B, 5B, 6G            |
| p-PDH                                | WB          | Calbiochem        | AP10062    | 1:10000       |                                           |
| NRF2                                 | WB          | Cell Signaling    | 12721      | 1:1000        |                                           |
| NQO1                                 | WB          | Cell Signaling    | 62262      | 1:1000        |                                           |
| KEAP1                                | WB          | Proteintech       | 10503-2-AP | 1:1000        |                                           |
| Snail                                | WB          | Cell Signaling    | 3879       | 1:1000        |                                           |
| Her2                                 | IF          | Cell Signaling    | 2165       | 1:200         |                                           |
| Cleaved Caspase-3 (Asp175)           | IF          | Cell Signaling    | 9661       | 1:300         |                                           |
| Ki67 - AlexaFluor 488                | IF          | BD Pharmingen     | 561165     | 1:100         |                                           |
| NRF2                                 | IF          | GeneTex           | GTX103322  | 1:250         |                                           |
| Annexin V - AlexaFluor 488           | Flow        | Life Technologies | V13245     | 1:20          |                                           |
| Goat anti-rabbit AlexaFluor 488      | IF          | Life Technologies | A11034     | 1:5000        |                                           |
| Goat anti-rabbit AlexaFluor 568      | IF          | Life Technologies | A11036     | 1:5000        |                                           |
| Goat anti-rabbit AlexaFluor 680      | WB          | Life Technologies | A21076     | 1:5000        |                                           |
| Goat anti-rabbit IRDye® 800CW        | WB          | LiCor             | 925-32211  | 1:5000        |                                           |
| Goat anti-mouse IRDye® 800CW         | WB          | LiCor             | 926-32210  | 1:5000        |                                           |
| Anti-rabbit IgG, HRP-linked antibody | WB          | Cell Signaling    | 7074P2     | 1:5000        |                                           |
| Ki67                                 | IHC         | Thermo Scientific | RM-9106-S  |               |                                           |

| Other dyes and staining materials |             |                |           |               |                                  |
|-----------------------------------|-------------|----------------|-----------|---------------|----------------------------------|
| Compound                          | Application | Supplier       | Catalog # | Concentration | Additional Notes                 |
| BODIPY 493/503                    | IF          | Thermo         | D3922     |               |                                  |
| Hoechst 33342                     | IF          | Thermo         | H1399     | 2 $\mu$ g/mL  |                                  |
| DCFDA                             | IF, Flow    | Abeam          | ab113851  | 10 $\mu$ M    |                                  |
| mitoSOX Red                       | Flow        | Thermo         | M36008    | 2.5 $\mu$ M   |                                  |
| Prolong Gold with DAPI            | IF          | Cell Signaling | 8961      |               | Used for all images with DAPI    |
| Prolong Gold                      | IF          | Thermo         | P36930    |               | Used for all images with Hoechst |

| Taqman gene expression probes |                             |               |                  |
|-------------------------------|-----------------------------|---------------|------------------|
| Taqman Master mix             | Applied Biosystems #4369016 |               |                  |
| Gene                          | Species                     | Catalog #     | Additional notes |
| Actb                          | mouse                       | Mm02619580_g1 |                  |
| Gapdh                         | mouse                       | Mm99999915_g1 | Used for Fig 6E  |
| Cpt1a                         | mouse                       | Mm01231183_m1 |                  |
| Cpt1b                         | mouse                       | Mm00487191_g1 |                  |
| Gclm                          | mouse                       | Mm01324400_m1 |                  |
| Nqo1                          | mouse                       | Mm01253561_m1 |                  |
| Hmox1                         | mouse                       | Mm00516005_m1 |                  |
| Slc7a11                       | mouse                       | Mm00442530_m1 |                  |
| NRF2 (Nfe2l2)                 | mouse                       | Mm00477784_m1 |                  |
| Pgd                           | mouse                       | Mm00503037_m1 |                  |
| Txnrd1                        | mouse                       | Mm00443675_m1 |                  |

| SYBR green gene expression primers |                         |                          |                  |
|------------------------------------|-------------------------|--------------------------|------------------|
| SYBR green master mix              | Bio-Rad #172-5121       |                          |                  |
| Gene                               | Forward sequence        | Reverse Sequence         | Additional notes |
| CD36                               | GAACCACTGCTTCAAAAAGCTGG | TGCTGTTCTTTGCCACGTC      |                  |
| Actb                               | CATGAAGATCCTGACCGAGCGTG | TCTGCTGGAAGGTGGACAGTGAGG |                  |
| Nqo1                               | TATCCTCCGAGTCATCTCTAGCA | TCTGAGCTTCCAGCTTCTTG     | Used for Fig S3A |
| Hmox1                              | CAGGTGATGCTGACAGAGGA    | GAGAGTGAGGACCCACTGGA     | Used for Fig S3A |
| Gclm                               | GCCACCAGATTGACTGCCITTTG | TGCTCTTACAGTACCGAGTACC   | Used for Fig S3A |

| CRISPR Screen Library Preparation Primers                                                                                  |                                                                                      |                                             |  |
|----------------------------------------------------------------------------------------------------------------------------|--------------------------------------------------------------------------------------|---------------------------------------------|--|
| DNA Polymerase Hot Start Version                                                                                           | Takara #R007B                                                                        |                                             |  |
| PCR1                                                                                                                       | Forward Sequence                                                                     | Reverse Sequence                            |  |
|                                                                                                                            | aatggactatcatatgcttaccgtaactgaagtatttcg                                              | ggaaagaatagtagacataatagcaacagacatacaactaaag |  |
| PCR2                                                                                                                       | Forward Sequence                                                                     |                                             |  |
|                                                                                                                            | Illumina P5 and Illumina seq                                                         |                                             |  |
|                                                                                                                            | AAATGATACGGCGACCACCGAGATCTACACTCTTTCCCTACACGACGCTCTTCCGATCT – 2-5bp stagger sequence |                                             |  |
|                                                                                                                            | Reverse Sequence                                                                     |                                             |  |
| Illumina P7 – 8bp barcode sequence – Illumina seq R – 1-9bp stagger sequence – priming site                                |                                                                                      |                                             |  |
| CAAGCAGAAGACGGCATACGAGAT – 8bp barcode – GTGACTGGAGTTCAGACGTGTGCTCTTCCGATCT – stagger sequence – TCTACTATTCCTTTCCCTGCAGTGT |                                                                                      |                                             |  |

**caNRF2 Cloning Primers****Forward sequence**

acttgtcagcggccaccatggattacaaagacgatgacgataaggccacgacatccagacagaccagtgg

**Reverse sequence**

atcagcggcccgactagttttcttctgtatctggtcttctgc

**Cell culture reagents**

| Compound                          | Supplier                             | Catalog # | Concentration | Additional notes                                      |
|-----------------------------------|--------------------------------------|-----------|---------------|-------------------------------------------------------|
| RPMI-1640                         | Sigma                                | R8758     |               |                                                       |
| DMEM                              | Corning                              | 10-017-CV |               |                                                       |
| Pen/Strep                         | Gibco                                | 15140-122 | 1x            |                                                       |
| L-Glutamine                       | Gibco                                | 25030-081 | 2mM           |                                                       |
| Fetal Bovine Serum (FBS)          | Corning                              | 35-010-CV |               |                                                       |
| Super Calf Serum (SCS)            | Gemini                               | 100-510   |               |                                                       |
| EGF                               | Sigma                                | E4127     | 10ng/mL       |                                                       |
| bFGF                              | Invitrogen                           | 13256-029 | 20ng/mL       |                                                       |
| B27 Supplement                    | Invitrogen                           | 17504-044 | 1x            |                                                       |
| Poly(2-hydroxyethyl methacrylate) | Sigma                                | P3932     |               |                                                       |
| Doxycycline                       | RPI                                  | D43020    | 2µg/mL        |                                                       |
| Insulin                           | Sigma                                | I6634     | 5µg/mL        |                                                       |
| Prolactin                         | National hormone and peptide program |           | 5µg/mL        | Provided by A. F. Parlow (Harbor-UCLA Medical Center) |
| hydrocortisone                    | Sigma                                | H0396     | 1µg/mL        |                                                       |
| Progesterone                      | Sigma                                | P7556     | 1µM           |                                                       |

**Cell treatment compounds**

| Compound                         | Supplier        | catalog #   | Additional Notes |
|----------------------------------|-----------------|-------------|------------------|
| Lapatinib                        | Selleckchem     | S1028       |                  |
| N-acetyl cysteine (NAC)          | Sigma           | A9165       |                  |
| Glutathione                      | Sigma           | G6013       |                  |
| Etomoxir                         | Tocris          | 4539        |                  |
| 6-Aminonicotinamide              | Cayman Chemical | 10009315    |                  |
| DHEA                             | Sigma           | D4000       |                  |
| TBHP                             | Abcam           | ab113851    | From DCFDA kit   |
| TBHQ                             | Sigma           | 112941      |                  |
| BPTES                            | Sigma           | SML0601-5MG |                  |
| CB-839                           | Cayman          | 22038       |                  |
| dimethyl $\alpha$ -ketoglutarate | Sigma           | 349631      |                  |
| MG-132                           | Sigma           | M7449-200UL |                  |

**Supplementary Table 2 - NRF2 gene signatures**

| <b>NRF2 Core Gene Signature</b> |              |
|---------------------------------|--------------|
| <b>Gene name</b>                | <b>Notes</b> |
| ABCB6                           |              |
| ABCC1                           |              |
| ABCC2                           |              |
| ABCG2                           |              |
| ABHD4                           |              |
| ADAM23                          |              |
| AKR1B10                         |              |
| AKR1C1                          |              |
| AKR1C3                          |              |
| ALDH3A1                         |              |
| ALDH3A2                         |              |
| ASF1A                           |              |
| ASNS                            |              |
| ASPH                            |              |
| BLVRB                           |              |
| C14ORF149                       | 1            |
| C16ORF28                        | 1,2          |
| C1S                             |              |
| CAMKK1                          | 1            |
| CBR1                            |              |
| CBR3                            |              |
| CCDC77                          | 1            |
| CCND3                           |              |
| CDKN2B                          |              |
| CES1                            |              |
| CLN5                            |              |
| CPLX2                           |              |
| CXCR7                           |              |
| CYP4F11                         |              |
| DDC                             |              |
| DEGS1                           |              |
| DGKG                            |              |
| DKFZP762E1312                   | 1,2          |
| DOCK10                          |              |
| EPHX1                           |              |
| F2RL2                           |              |
| FAM55C                          |              |
| FTH1                            |              |
| FZD7                            |              |
| G6PD                            |              |
| GALNT13                         | 1            |

| <b>NRF2 18-gene Signature</b> |
|-------------------------------|
| <b>Gene name</b>              |
| FTH1                          |
| G6PD                          |
| GCLC                          |
| GCLM                          |
| GPX2                          |
| GSR                           |
| HMOX1                         |
| HMOX2                         |
| IDH1                          |
| ME1                           |
| NQO1                          |
| NQO2                          |
| PGD                           |
| PRDX1                         |
| SLC7A11                       |
| TXN                           |
| TXN2                          |
| TXNRD1                        |

|           |     |
|-----------|-----|
| GCLC      |     |
| GCLM      |     |
| GLA       |     |
| GPC1      |     |
| GPX2      |     |
| GSR       |     |
| HGD       |     |
| HMOX1     |     |
| HRB       | 1,2 |
| HSPA1B    |     |
| HTATIP2   |     |
| IDH1      |     |
| KIAA0319  |     |
| LOC642252 | 1,2 |
| LOC644799 | 1,2 |
| LRP12     |     |
| LRP8      |     |
| LTB4DH    | 1,2 |
| MAFG      |     |
| MAP2      |     |
| MARS      |     |
| MCM10     |     |
| ME1       |     |
| MEGF9     |     |
| MGT1      | 1   |
| MSC       |     |
| NCF2      |     |
| NEIL3     |     |
| NFE2L2    |     |
| NLN       | 1   |
| NQO1      |     |
| NQO2      |     |
| NR0B1     | 2   |
| NRCAM     |     |
| OSGIN1    |     |
| P2RY6     |     |
| PA2G4     |     |
| PBEF1     | 1,2 |
| PCK2      |     |
| PGD       |     |
| PIR       |     |
| POPDC3    |     |
| PPAT      |     |
| PRDX1     |     |
| RRM2      |     |

|          |     |
|----------|-----|
| SERPINE1 |     |
| SFN      |     |
| SLC38A6  |     |
| SLC6A6   |     |
| SLC7A11  |     |
| SORD     |     |
| SPANXA1  | 1,2 |
| SPANXB1  | 1,2 |
| SPP1     |     |
| SQSTM1   |     |
| SRXN1    | 1   |
| TALDO1   |     |
| TFRC     |     |
| TGFB2    |     |
| TKT      |     |
| TM4SF20  | 2   |
| TRIM16   |     |
| TSPAN7   |     |
| TXN      |     |
| TXNRD1   |     |
| UCHL1    |     |
| UIP1     | 1,2 |

From Romero, R. et al. Keap1 loss promotes Kras-driven lung cancer and results in dependence on glutaminolysis. *Nat Med* 23, 1362-1368 (2017).

1: Gene excluded from survival analysis (not found in human gene expression datasets).

2: Gene excluded from GSEA (not found in human recurrent tumor gene expression datasets).
